# Supplementary material for: Factors Influencing the Continuation of Work in Patients with Cancer Willing to Work: An Exploratory Study
Source: MDPI journal article supplement (doi:10.3390/socsci12030115), 2023-02-23
Supplement: s1 [file s1]

**Table S1.** QLQ-C30 by work status.

| QLQ-C30                     | Mean ± SD   |             | p-value <sup>a</sup> |
|-----------------------------|-------------|-------------|----------------------|
|                             | Non-working | Working     |                      |
| Functional scale            |             |             |                      |
| Physical functioning (PF)   | 80.1 ± 22.7 | 87.7 ± 15.9 | *.006                |
| Role functioning (RF)       | 75.7 ± 28.4 | 89.3 ± 18.2 | **<.001              |
| Emotional functioning (EF)  | 74.3 ± 27.6 | 85.0 ± 20.4 | *.002                |
| Cognitive functioning (CF)  | 73.3 ± 26.7 | 84.3 ± 21.1 | **<.001              |
| Social functioning (SF)     | 65.9 ± 30.8 | 82.6 ± 24.5 | **<.001              |
| Symptom scale               |             |             |                      |
| Fatigue (FA)                | 32.8 ± 26.8 | 24.5 ± 23.4 | *.013                |
| Nausea/vomiting (NV)        | 6.4 ± 14.7  | 4.1 ± 13.8  | .055                 |
| Pain (PA)                   | 19.1 ± 25.3 | 13.6 ± 21.2 | .054                 |
| Dyspnea (DY)                | 15.7 ± 21.9 | 8.1 ± 17.2  | **<.001              |
| Insomnia (IN)               | 24.0 ± 33.5 | 16.6 ± 25.3 | .150                 |
| Appetite loss (AP)          | 12.3 ± 24.4 | 7.2 ± 18.8  | .051                 |
| Constipation (CO)           | 17.6 ± 27.9 | 13.0 ± 23.5 | .198                 |
| Diarrhea (DI)               | 12.7 ± 21.6 | 8.3 ± 20.5  | *.022                |
| Financial difficulties (FI) | 39.2 ± 37.7 | 22.1 ± 31.6 | **<.001              |
